# Supplementary material for: Nanoscale conductive niobium oxides made through low temperature phase transformation for electrocatalyst support
Source: Royal Society of Chemistry journal article supplement (doi:10.1039/c3ra47091a), 2014-01-01
Supplement: c3ra47091a.pdf [file c3ra47091a.pdf]

## Nanoscale conductive niobium oxides made through low temperature phase transformation for electrocatalyst support

Kan Huang, Yunfeng Li, Litao Yan, Yangchuan Xing\*

Department of Chemical Engineering, University of Missouri, Columbia, Missouri 65211

\*Corresponding author. Tel.: +1 573 884 1067. E-mail address: xingy@missouri.edu (Y. Xing).

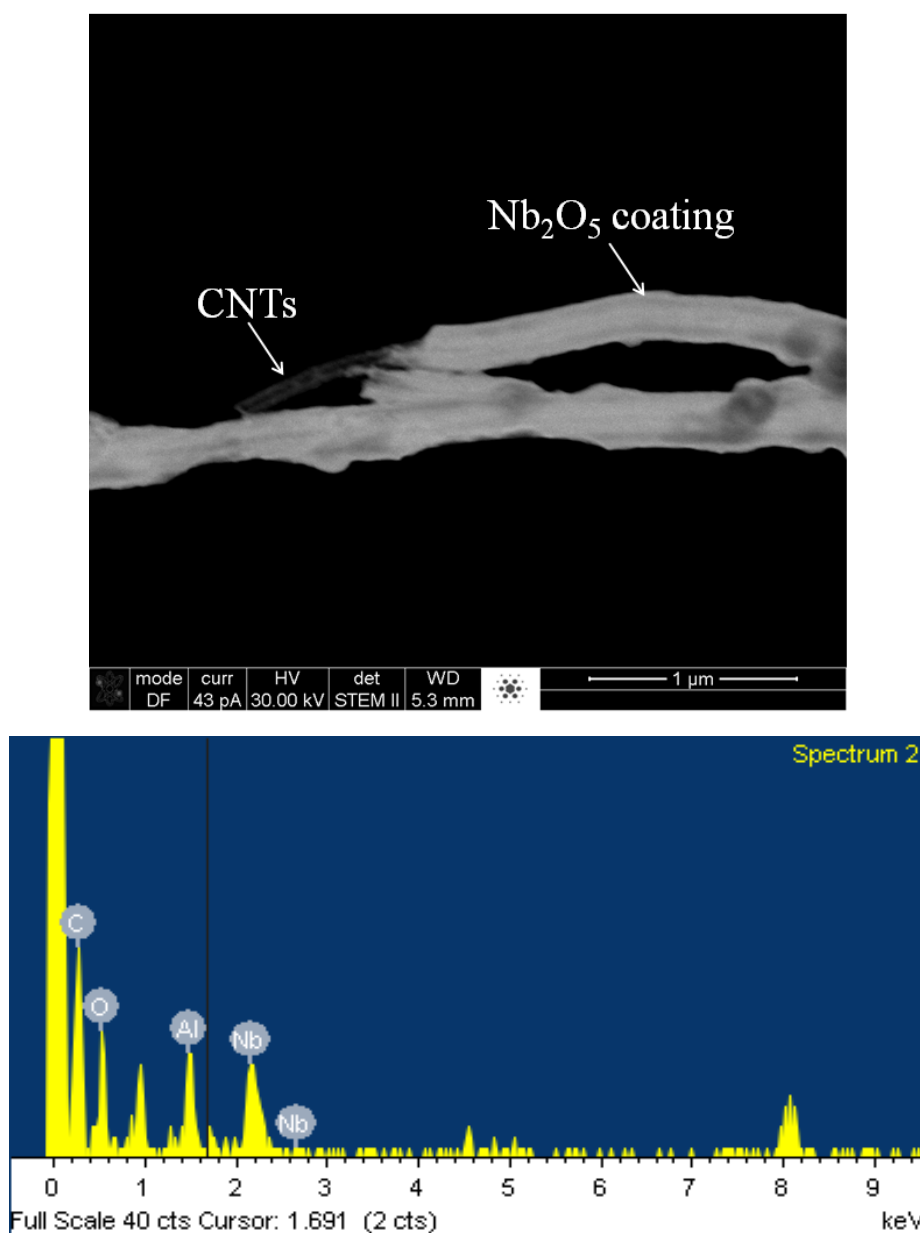

**Fig. S1.** EDX of Nb<sub>2</sub>O<sub>5</sub>/CNTs sample supported on a copper mesh TEM grid, showing the presence of Nb element. Some background elements (e.g. Al) of the sample support (TEM grid) are also present.

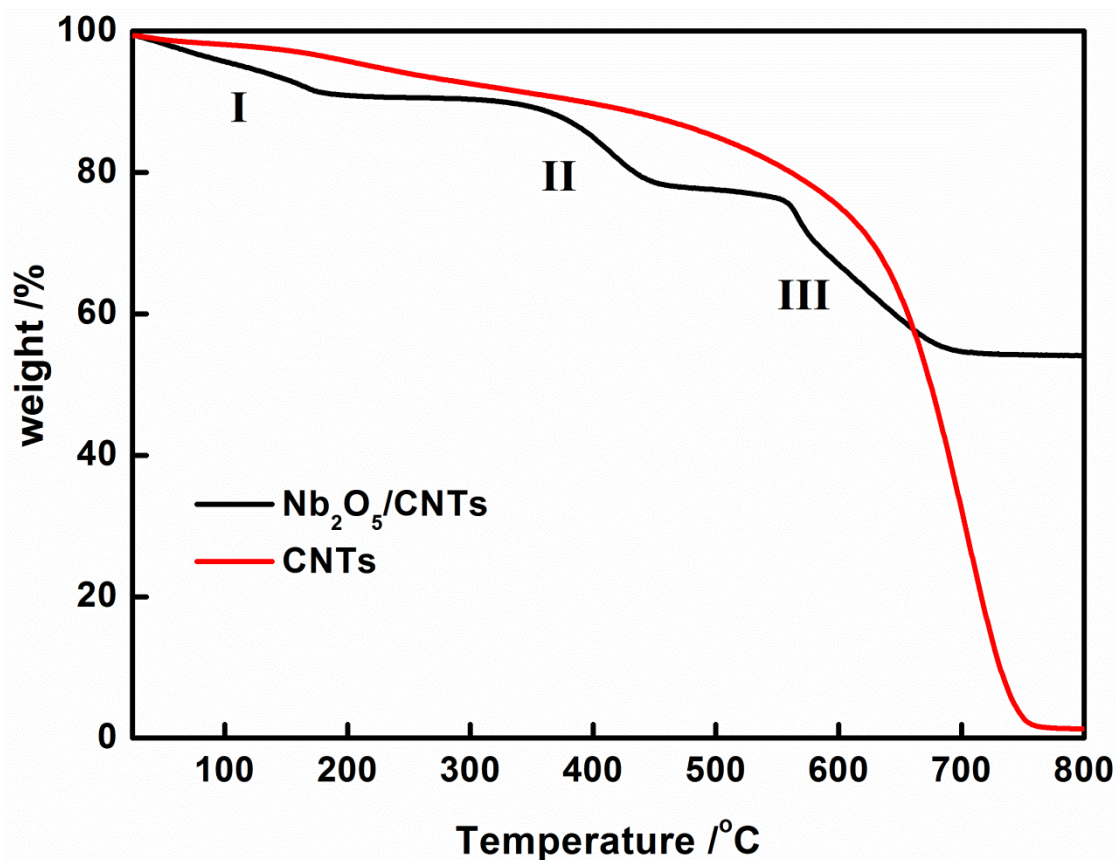

**Fig. S2.** Thermogravimetric analysis of Nb<sub>2</sub>O<sub>5</sub>/CNTs and CNTs. The analysis was carried out under air atmosphere with heating rate of 10 °C/min. The featured three stages of Nb<sub>2</sub>O<sub>5</sub>/CNTs are (I) removal of water and organic solvents, (II) densification of the amorphous Nb<sub>2</sub>O<sub>5</sub> network and crystallization from amorphous to H-Nb<sub>2</sub>O<sub>5</sub> (Hexagonal), and (III) oxidation of CNTs. Two flat stages between (I)/(II) and (II)/(III) suggest nearly no weight loss. Nb<sub>2</sub>O<sub>5</sub> nanocoating is believed to protect CNTs from oxidation at relatively low temperature. Slow weight loss of CNTs starts at beginning and drops quickly beyond 600 °C until completed oxidation.

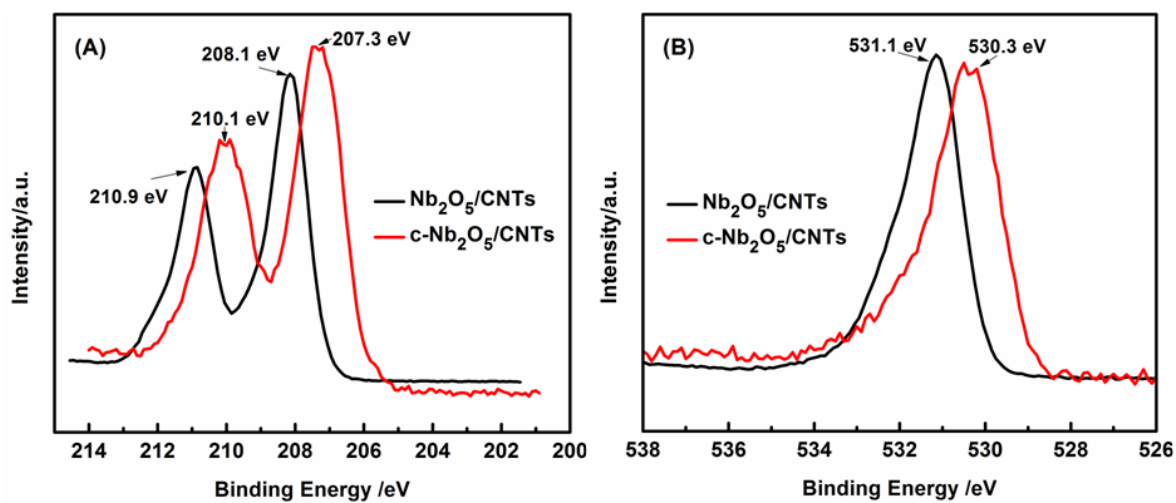

**Fig. S3.** XPS results of Nb 3d and O 1s from c-Nb<sub>2</sub>O<sub>5</sub>/CNTs and Nb<sub>2</sub>O<sub>5</sub>/CNTs. According to U.S. National Institute of Standards and Technology (NIST), Nb 3d<sub>5/2</sub> in Nb<sub>2</sub>O<sub>5</sub> and NbO<sub>2</sub> display binding energies (BEs) at 208.1 eV and 205.7 eV, respectively. (A) The Nb 3d BEs in c-Nb<sub>2</sub>O<sub>5</sub>/CNTs shifts towards lower oxidation state may suggest a formation of reduced oxide layer, and (B) The O 1s found at 530.3 eV in c-Nb<sub>2</sub>O<sub>5</sub>/CNTs suffers a negative shift compared with Nb<sub>2</sub>O<sub>5</sub>/CNT at 531.1 eV.
